# Supplementary material for: Xeno interactions between MHC-I proteins and molecular chaperones enable ligand exchange on a broad repertoire of HLA allotypes
Source: PubMed Central journal article supplement (PMC9956121; doi:10.1126/sciadv.ade7151), 2023-02-24
Supplement: sciadv.ade7151_sm.pdf [file sciadv.ade7151_sm.pdf]

Supplementary Materials for

**Xeno interactions between MHC-I proteins and molecular chaperones enable ligand exchange on a broad repertoire of HLA allotypes**

Yi Sun *et al.*

Corresponding author: Nikolaos G. Sgourakis, [nikolaos.sgourakis@pennmedicine.upenn.edu](mailto:nikolaos.sgourakis@pennmedicine.upenn.edu)

*Sci. Adv.* **9**, eade7151 (2023)  
DOI: 10.1126/sciadv.ade7151

**This PDF file includes:**

Figs. S1 to S17  
Tables S1 to S4

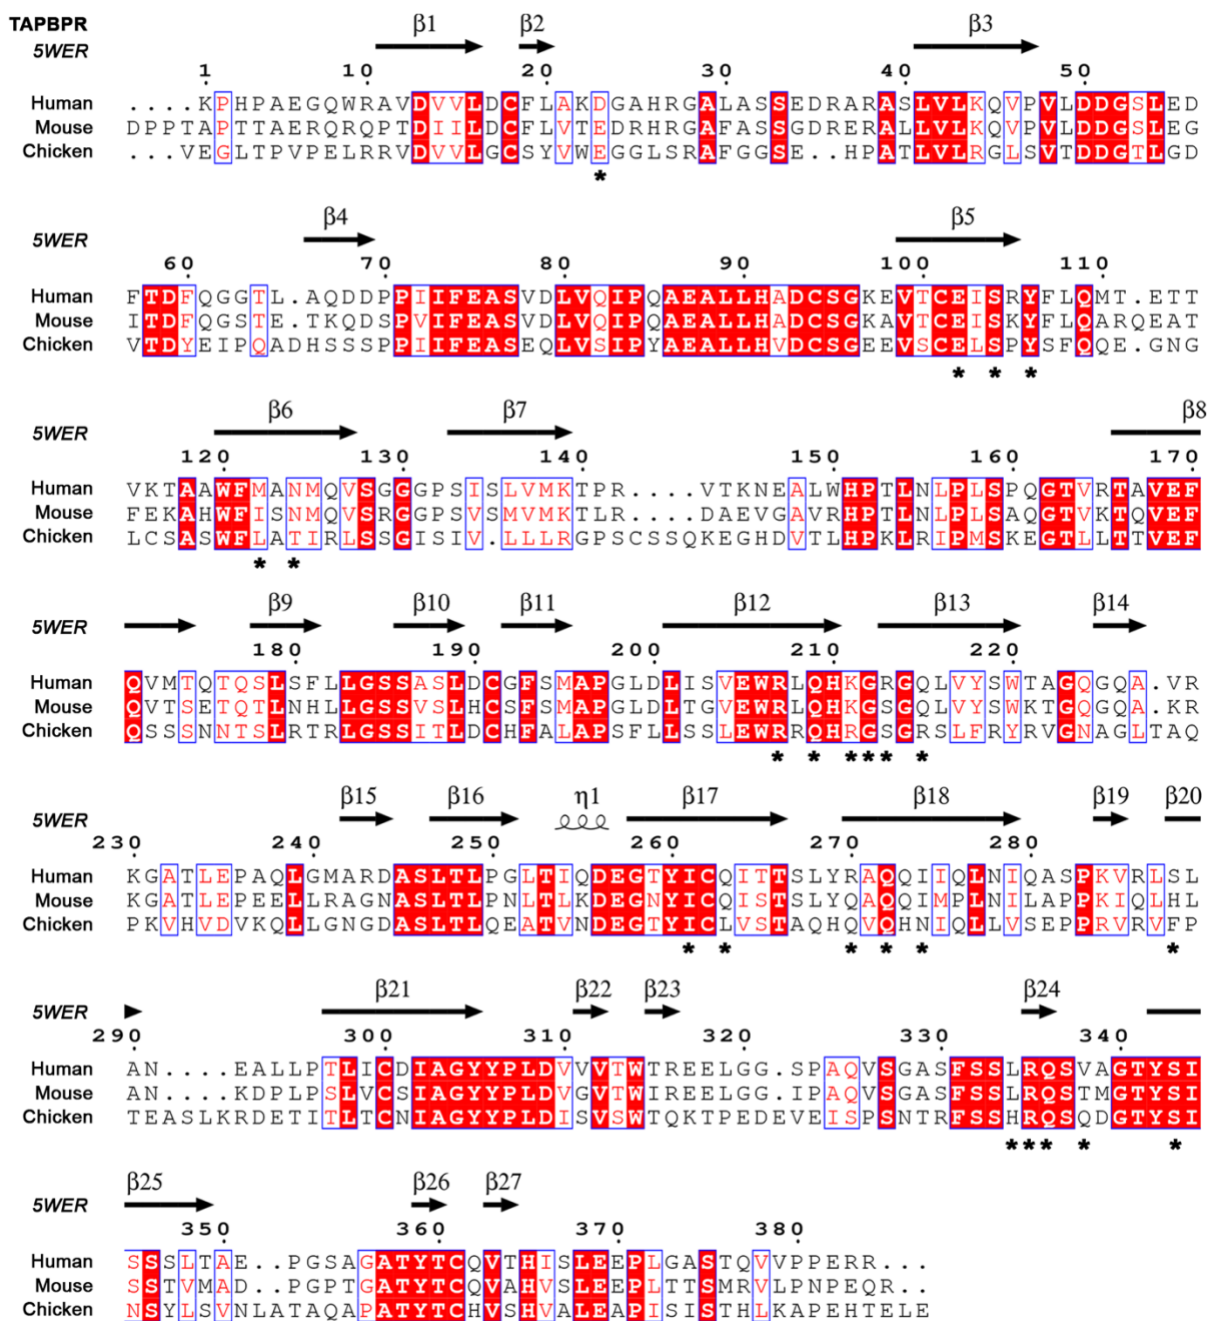

**Figure S1. Sequence alignment between human, mouse, and chicken TAPBPR.** Alignment of the luminal domains of human (UniProtKB/Swiss-Prot: Q9BX59), mouse (XP\_030111162.1), and chicken (NP\_001382952.1) TAPBPR. Conserved residues are marked in blue boxes, and the residues that are in direct contact with the MHC-I heavy chain based on the X-ray structure of the

H2-D<sup>d</sup>/hTAPBPR complex<sup>1</sup> are noted with asterisks (\*). The secondary structure of human TAPBPR (PDB ID: 5WER) is provided as a reference.

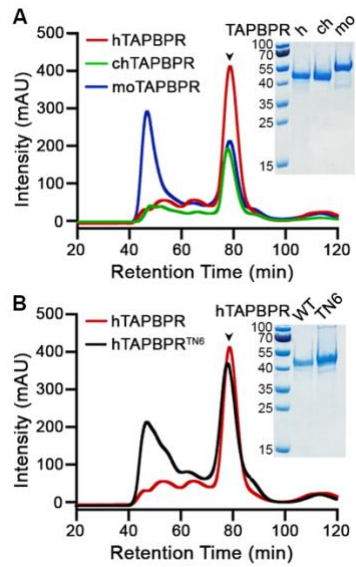

**Figure S2. Purification of recombinant TAPBPR proteins.** (A)-(B), Size exclusion chromatography (SEC) traces of (A) hTAPBPR, chTAPBPR, moTAPBPR, and (B) hTAPBPR<sup>TN6</sup> proteins. The protein peaks are indicated by the arrow and further confirmed by SDS/PAGE analysis.



anti-mouse PE-conjugated antibody (Abcam, ab97024). Similar levels of peptide-loaded MHC-I molecules were observed across different HLA allotypes. **(B)-(E)**, Bar graphs showing the logarithm of Mean Fluorescent Intensity (MFI) levels of tetramerized **(B)** hTAPBPR<sup>TN6</sup> (negative control), **(C)** hTAPBPR, **(D)** chTAPBPR, and **(E)** moTAPBPR binding to HLA molecules on SABs. Incubation with the W6/32 antibody prior to tetramer addition was used to control for background staining levels. The plotted data were generated based on n=3 independent experiments and the standard deviation is depicted with error bars.

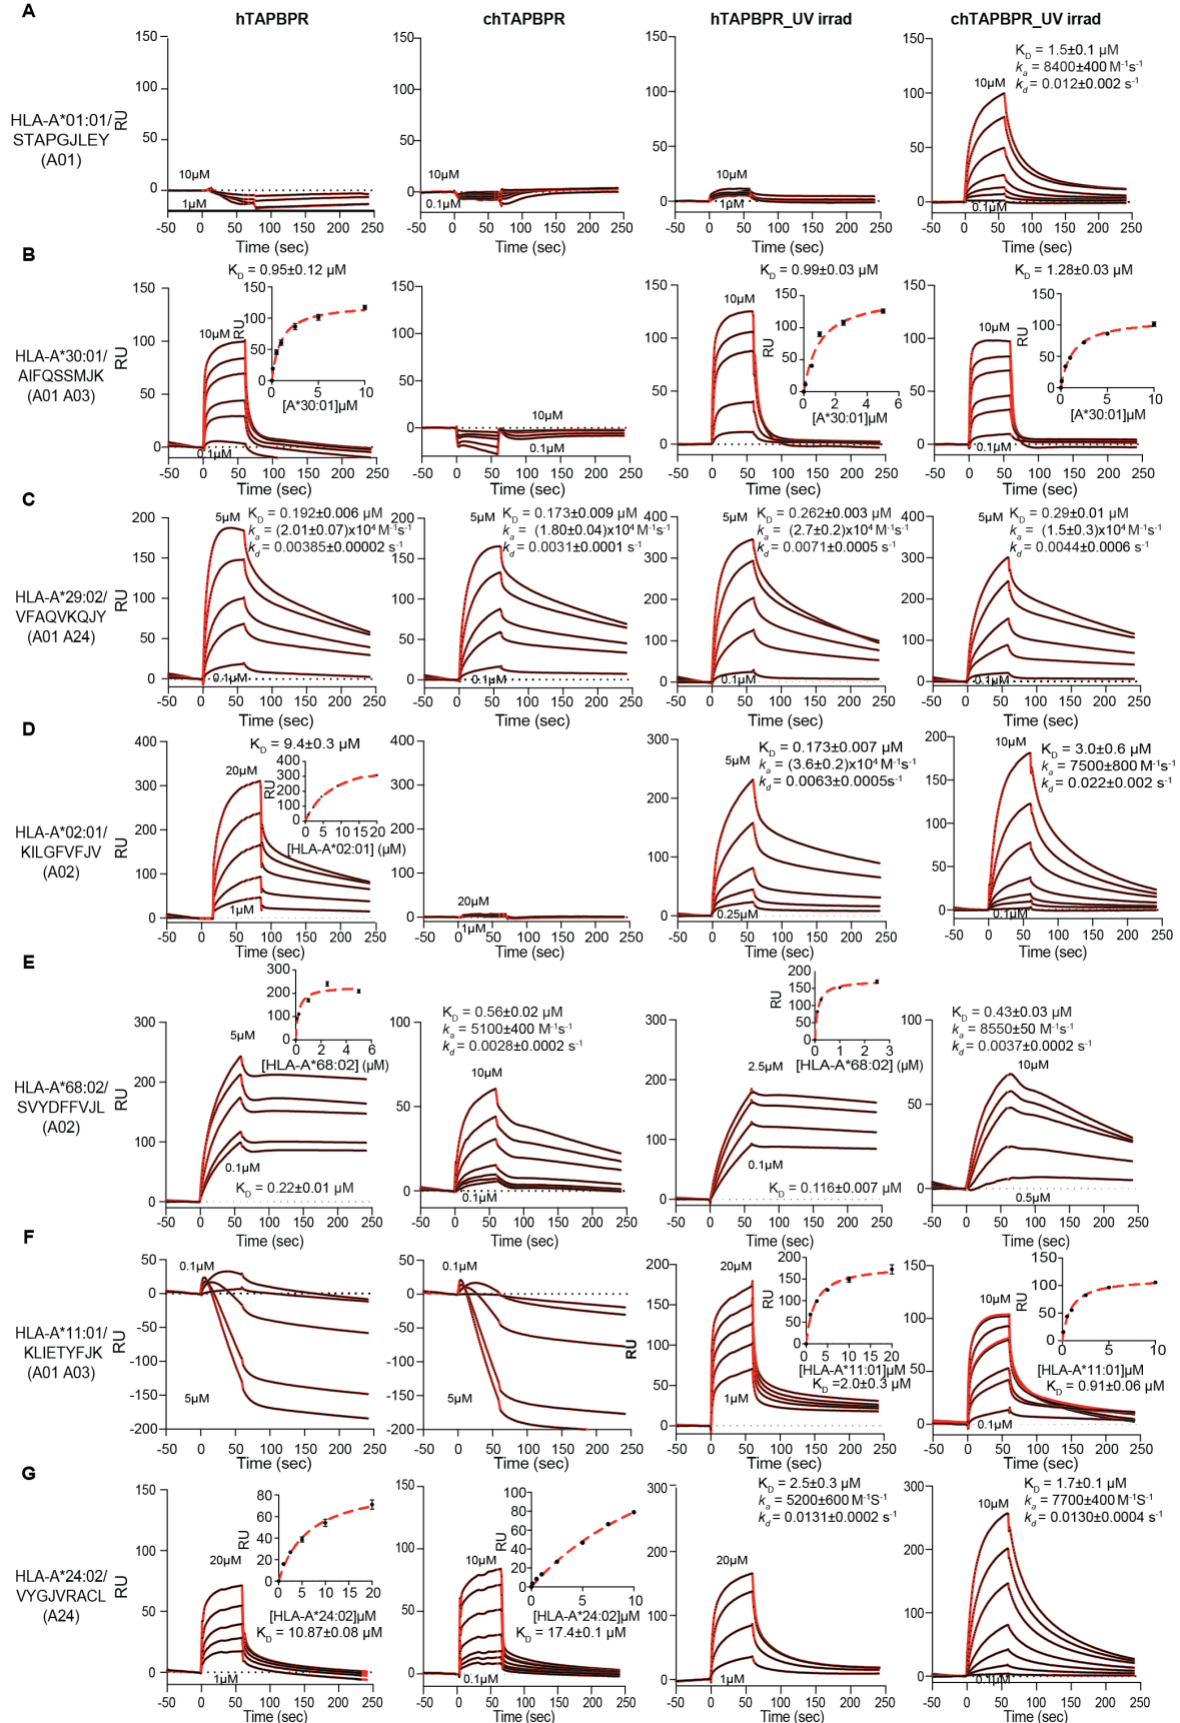

**Figure S4. Direct interactions between HLA-A allotypes and TAPBPR orthologs.** (A)-(G), SPR sensorgrams of various concentrations of peptide-loaded or -deficient (A) HLA-A\*01:01, (B) HLA-A\*30:01, (C) HLA-A\*29:02, (D) HLA-A\*02:01, (E) HLA-A\*68:02, (F) HLA-A\*11:01, and (G) HLA-A\*24:02 flowed over a streptavidin chip coupled with hTAPBPR or chTAPBPR-biotin. The concentrations of analyte for the top and the bottom sensorgrams are noted. Data are mean  $\pm$   $\sigma$ , where n=2 for HLA-A\*01:01, HLA-A\*02:01 (chTAPBPR), and HLA-A\*24:02 (chTAPBPR), and n=3 for HLA-A\*30:01, HLA-A\*29:02, HLA-A\*02:01 (hTAPBPR), HLA-A\*68:02, HLA-A\*11:01, and HLA-A\*24:02 (hTAPBPR).  $K_D$ , equilibrium constant;  $k_a$ , association rate constant;  $k_d$ , dissociation rate constant; RU, resonance units.



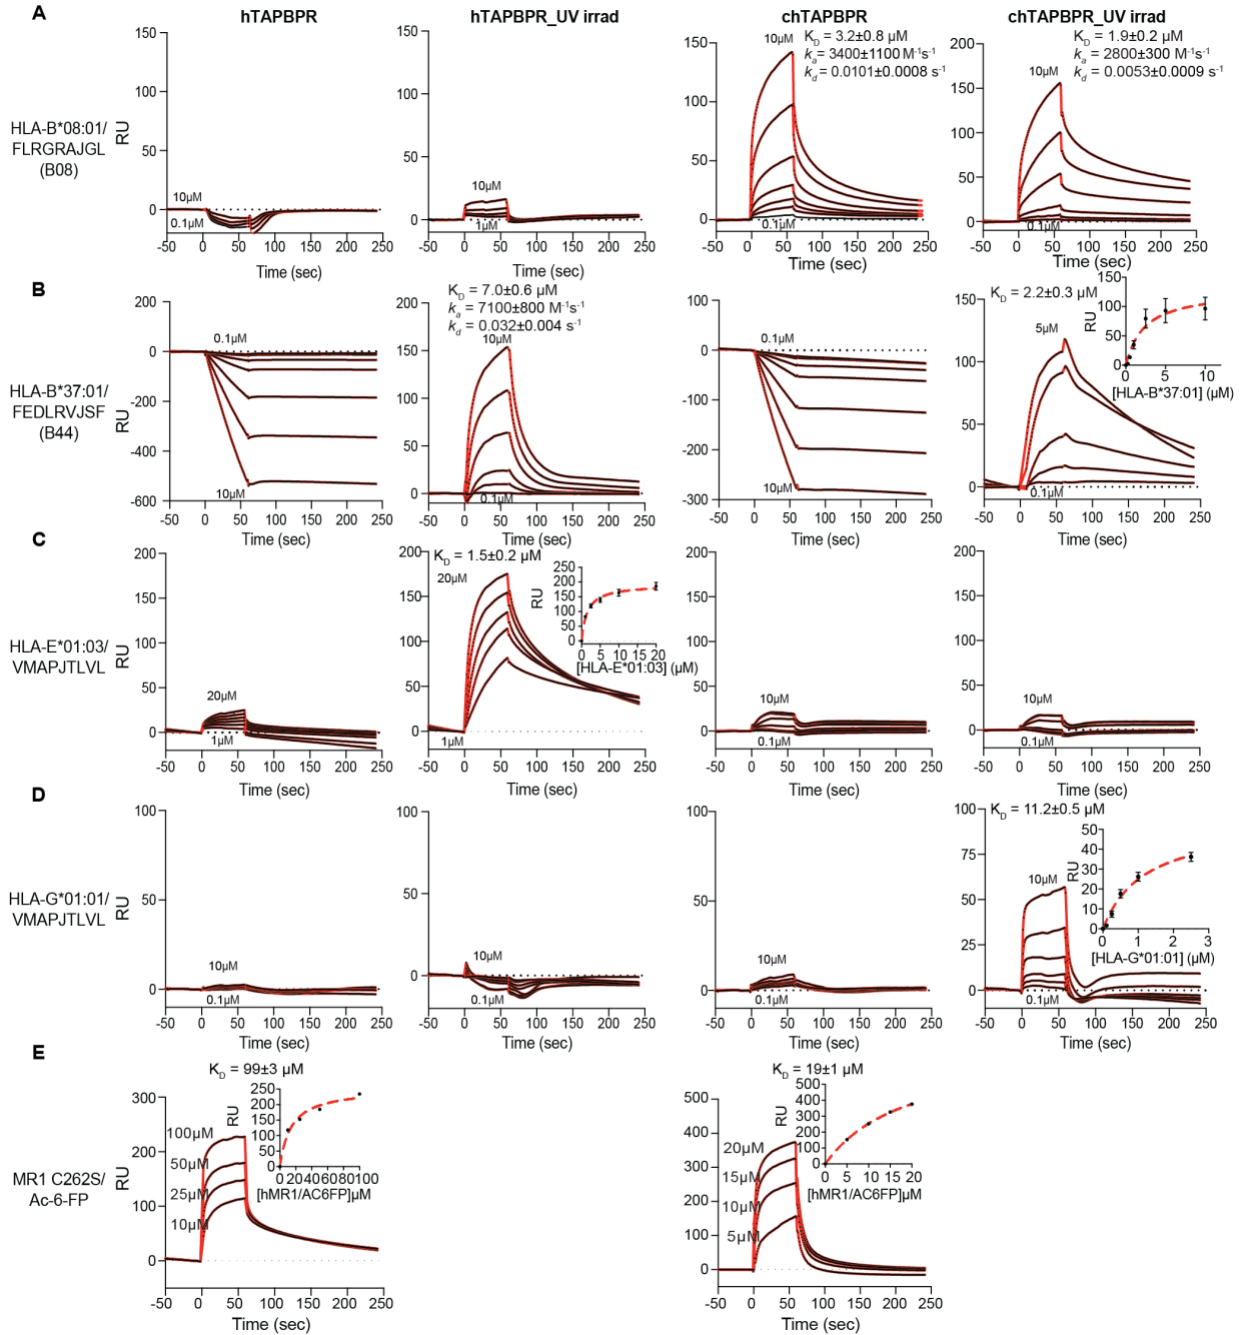

**Figure S5. Direct interactions between HLA-B, MHC-Ib, or MR1 molecules and TAPBPR orthologs. (A)-(D),** SPR sensorgrams of various concentrations of peptide-loaded or -deficient (A) HLA-B\*08:01, (B) HLA-B\*37:01, (C) HLA-E\*01:03, and (D) HLA-G\*01:01 flowed over a streptavidin chip coupled with hTAPBPR or chTAPBPR-biotin. (E), SPR sensorgrams of various concentrations of Ac-6-FP loaded MR1 C262S flowed over a streptavidin chip coupled with

hTAPBPR or chTAPBPR-biotin. The concentrations of analyte for the top and the bottom sensorgrams are noted. Data are mean  $\pm$   $\sigma$ , where n=2 for UV irradiated HLA-B\*08:01, HLA-B\*37:01 (hTAPBPR), HLA-E\*03:01, and HLA-G\*01:01, and n=3 for HLA-B\*08:01, HLA-B\*37:01 (chTAPBPR), and MR1.  $K_D$ , equilibrium constant;  $k_a$ , association rate constant;  $k_d$ , dissociation rate constant; RU, resonance units.

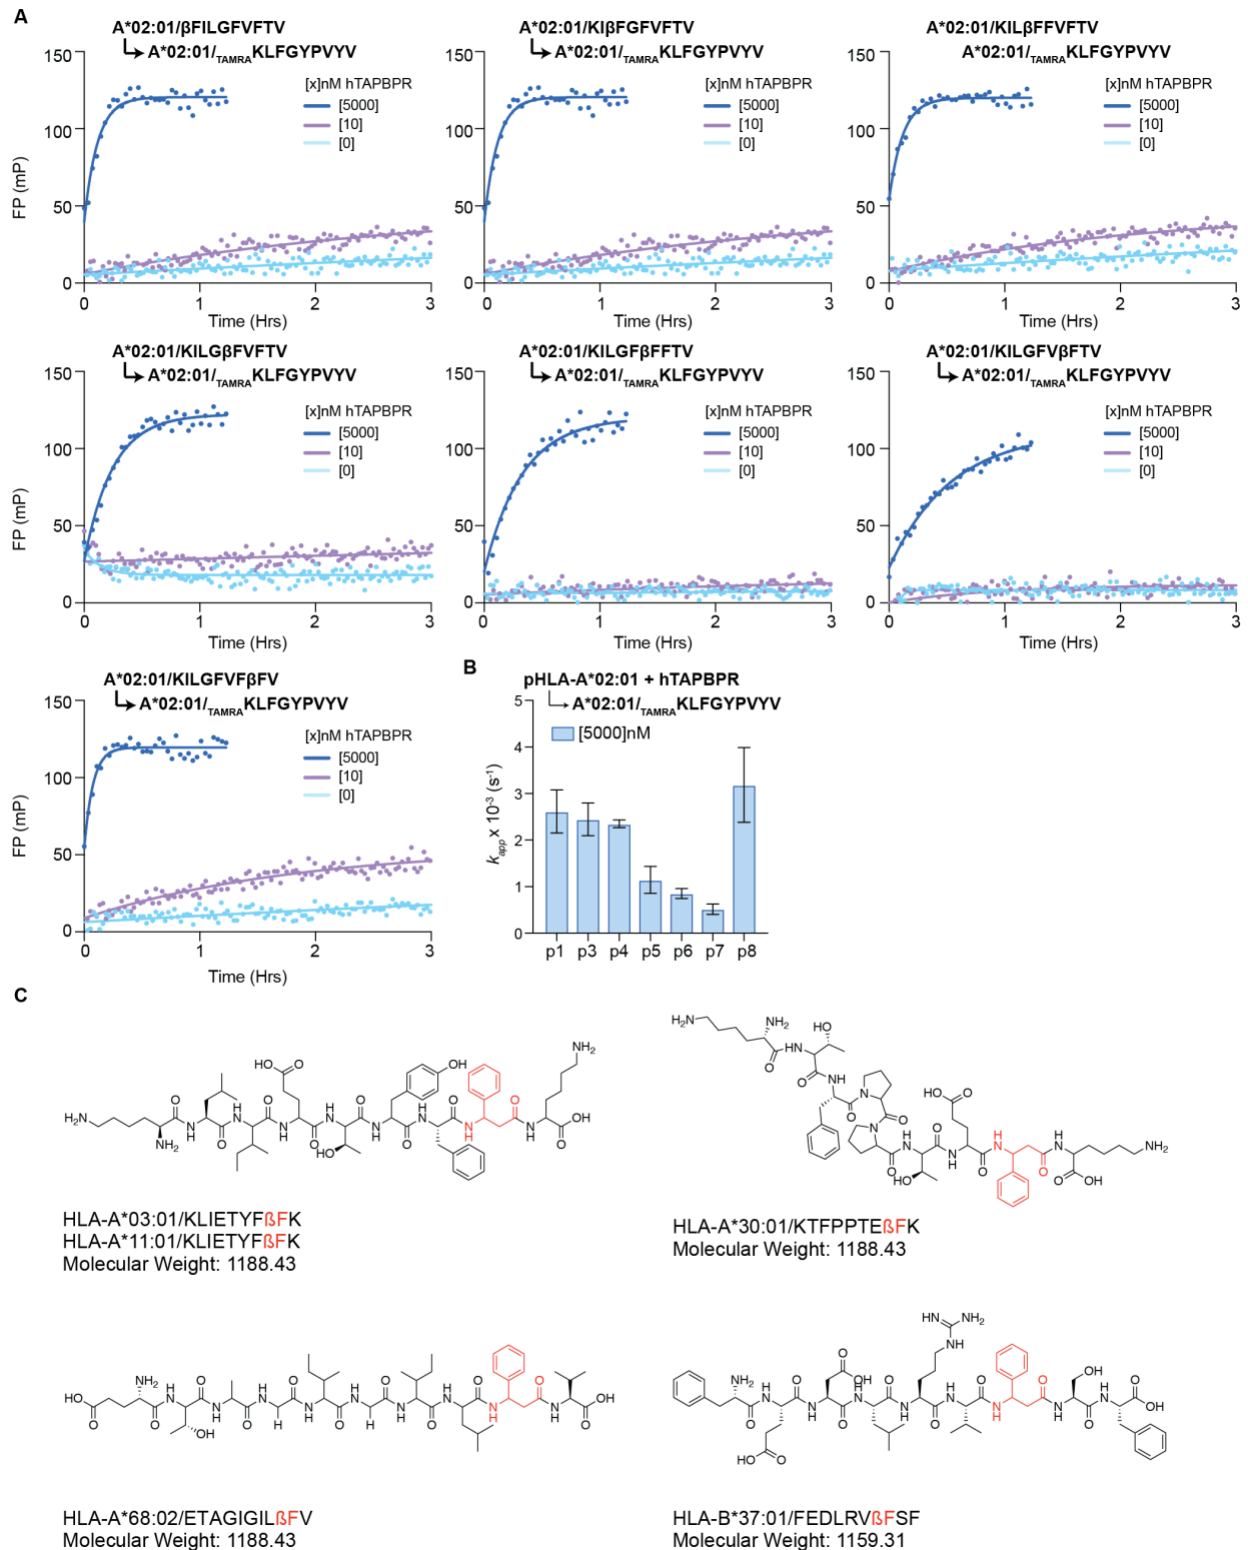

**Figure S6. Structure-guided design of conditional peptide ligands influences TAPBPR-mediated peptide exchange kinetics for different HLA allotypes. (A), Assessing the effect of**

the L- $\beta$ -Phenylalanine residue ( $\beta$ F) at different peptide positions of HLA-A\*02:01-restricted KILGFVFTV by fluorescence polarization (FP). The association profiles of the fluorophore-conjugated peptide TAMRAKILFGYPVYV to HLA-A\*02:01/ $\beta$ FILGFVFTV, KI $\beta$ FGFVFTV, KIL $\beta$ FFVFTV, KILG $\beta$ FVFTV, KILGF $\beta$ FTV, KILGFV $\beta$ FTV, KILGFV $\beta$ FV without hTAPBPR, with 10 nM or 5000 nM hTAPBPR, as indicated. The data were fitted to a monoexponential association model to determine the apparent rate constant  $k_{app}$ . Results of three replicates (mean) are plotted. **(B)**, The comparison of  $k_{app}$  for fluorescent peptide binding to HLA-A\*02:01/KILGFVFTV with  $\beta$ F substitution at indicated positions in the presence of 5000 nM hTAPBPR. The apparent rate constant  $k_{app}$  was determined by fitting the raw trace to a monoexponential association model. Results of three replicates (mean  $\pm$   $\sigma$ ) are plotted. **(C)**, Structure-guided design of conditional peptide ligands for different HLA allotypes. The  $\beta$ F peptide ligands KLIETYF $\beta$ FK, KTFPPTE $\beta$ FK, ETAGIGIL $\beta$ FV, and FEDLRV $\beta$ FSF are based on the HLA-A\*03:01 immunodominant proteolipid protein (PLP) epitope KLIETYFSK, HLA-A\*30:01 SARS-CoV-2 nucleoprotein epitope KTFPPTEPK, HLA-A\*68:02 peptide ETAGIGILTV, and HLA-B\*37:01 Influenza NP338-346 peptide FEDLRVLSF.

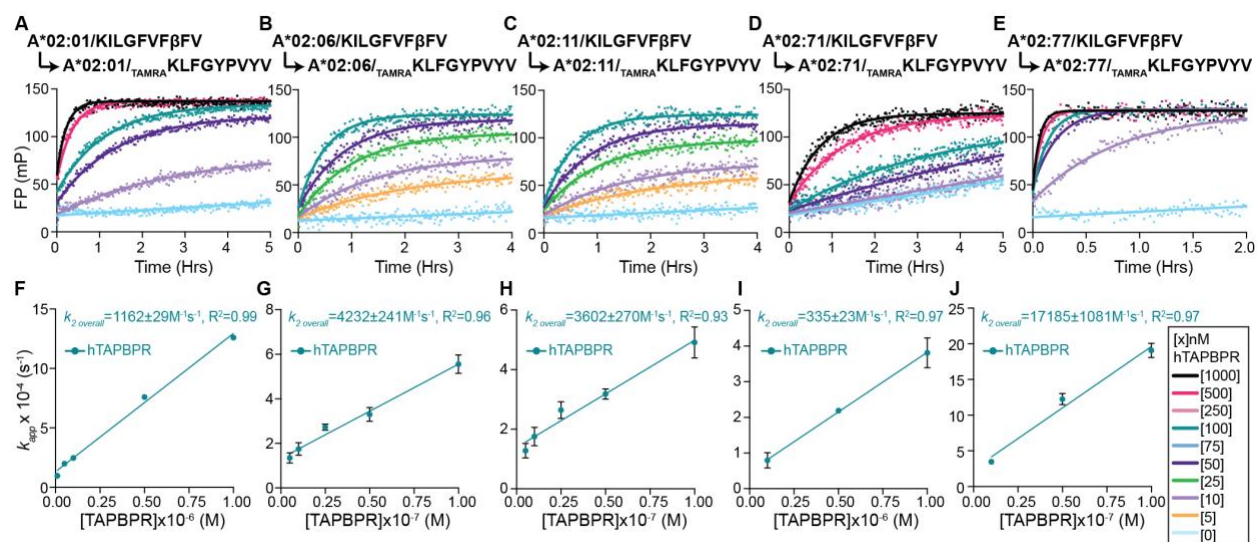

**Figure S7. Effect of HLA-A\*02 micropolymorphisms on peptide exchange by hTAPBPR.**

(A)-(E), Association profiles of the fluorophore-conjugated peptide TAMRAKLFGYPVYV to KILGFVFBFV loaded (A) HLA-A\*02:01, (B) HLA-A\*02:06, (C) HLA-A\*02:11, (D) HLA-A\*02:71, and (E) HLA-A\*02:77 in the presence of hTAPBPR at various concentrations, as indicated. The data were fitted to a monoexponential association model to determine apparent rate constants  $k_{app}$ . Results of three replicates (mean) are plotted. (F)-(J), Linear correlations between the apparent rate constants  $k_{app}$  and the concentrations of hTAPBPR for (F) HLA-A\*02:01, (G) HLA-A\*02:06, (H) HLA-A\*02:11, (I) HLA-A\*02:71, and (J) HLA-A\*02:77. The extrapolation of the slope determines the overall rate  $k_{2overall}$ . Results of three replicates (mean  $\pm \sigma$ ) are plotted.

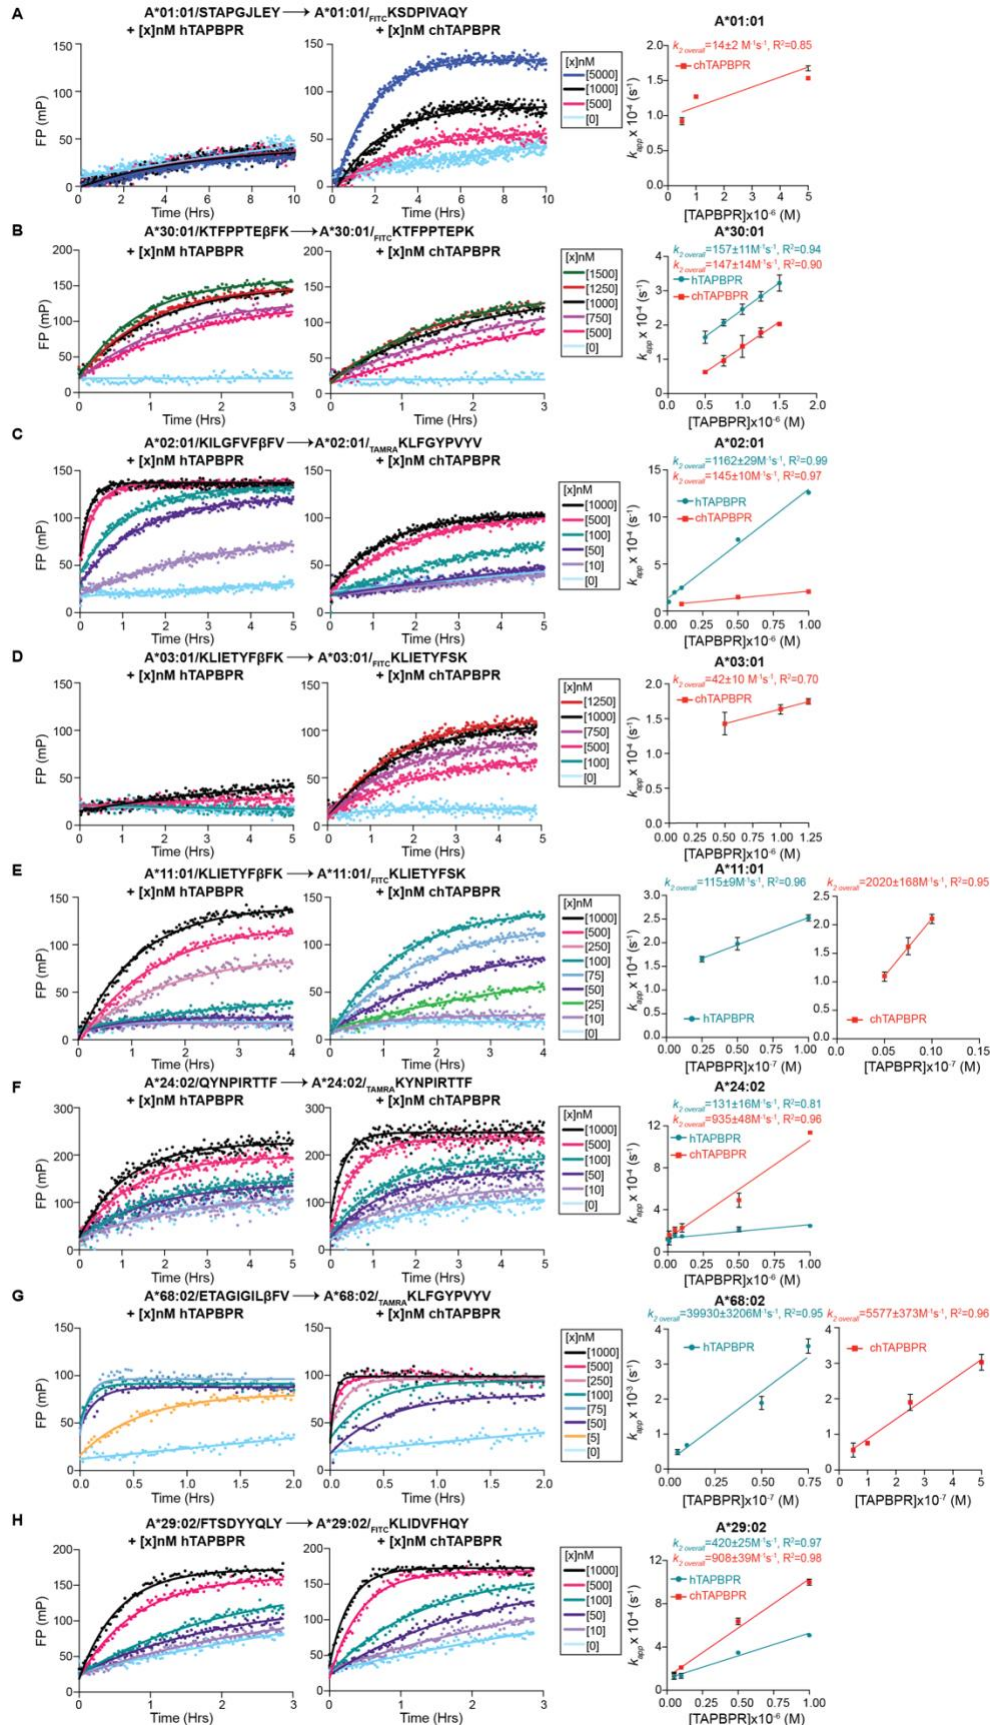

**Figure S8. HLA-A peptide exchange kinetics by human vs. chicken TAPBPR.** (A)-(G), The association profiles of fluorophore-conjugated peptide  $_{FITC}KSDPIVAQY$ ,  $_{FITC}KTFPPTEPK$ ,  $_{TAMRA}KLFQYPVYV$ ,  $_{FITC}KLIETYFSK$ ,  $_{TAMRA}KYNPIRTTF$ , and  $_{FITC}KLIDVFHQY$  to (A) HLA-A\*01:01/STAPGJLEY, (B) HLA-A\*30:01/KTFPPTE $\beta$ FK, (C) HLA-A\*02:01/KILGFVF $\beta$ FV, (D) HLA-A\*03:01/KLIETYF $\beta$ FK, (E) HLA-A\*11:01/KLIETYF $\beta$ FK, (F) HLA-A\*24:02/QYNPIRTTF, (G) HLA-A\*68:02/ETAGIGIL $\beta$ FV, and (H) HLA-A\*29:02/FTSDYYQLY in the presence of human or chicken TAPBPR at various concentrations, as indicated. Results of three replicates (mean) are plotted. The data were fitted to a monoexponential association model to determine apparent rate constants  $k_{app}$ . Linear correlations between the apparent rate constants  $k_{app}$  and the concentrations of TAPBPR orthologs were determined. The extrapolation of the slope determines the overall rate  $k_{2overall}$ . Results of three replicates (mean  $\pm \sigma$ ) are plotted.



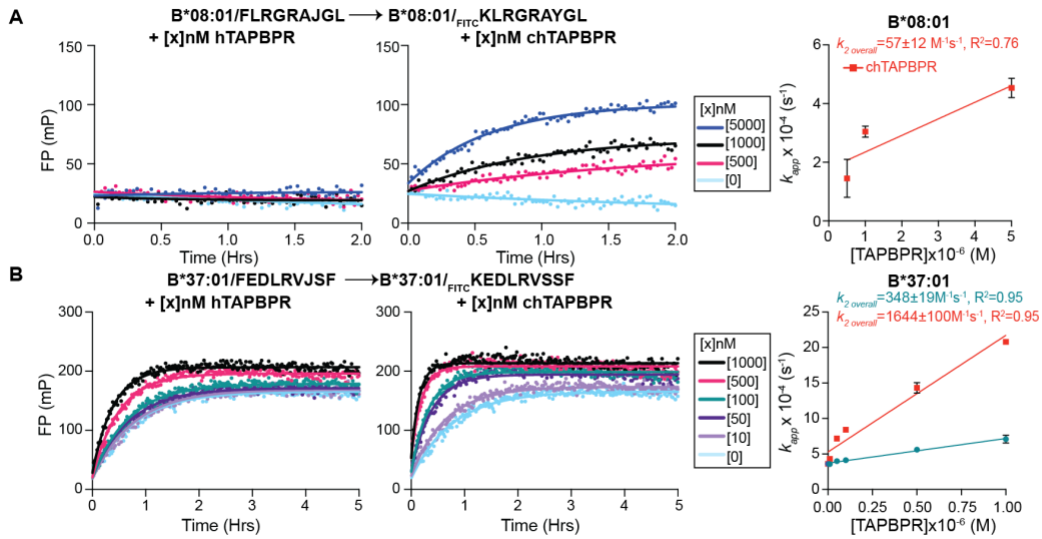

**Figure S9. HLA-B peptide exchange kinetics by human vs. chicken TAPBPR.** (A)-(B), The association profiles of fluorophore-conjugated peptide <sub>FITC</sub>KLRGRAYGL and <sub>FITC</sub>KEDLRVSSF to (A) HLA-B\*08:01/FLRGRAJGL and (B) HLA-B\*37:01/FEDLRVJSF in the presence of human or chicken TAPBPR at various concentrations, as indicated. Results of three replicates (mean) are plotted. The data were fitted to a monoexponential association model to determine apparent rate constants  $k_{app}$ . Linear correlations between the apparent rate constants  $k_{app}$  and the concentrations of TAPBPR orthologs were determined. The extrapolation of the slope determines the overall rate  $k_{2 \text{ overall}}$ . Results of three replicates (mean  $\pm \sigma$ ) are plotted.



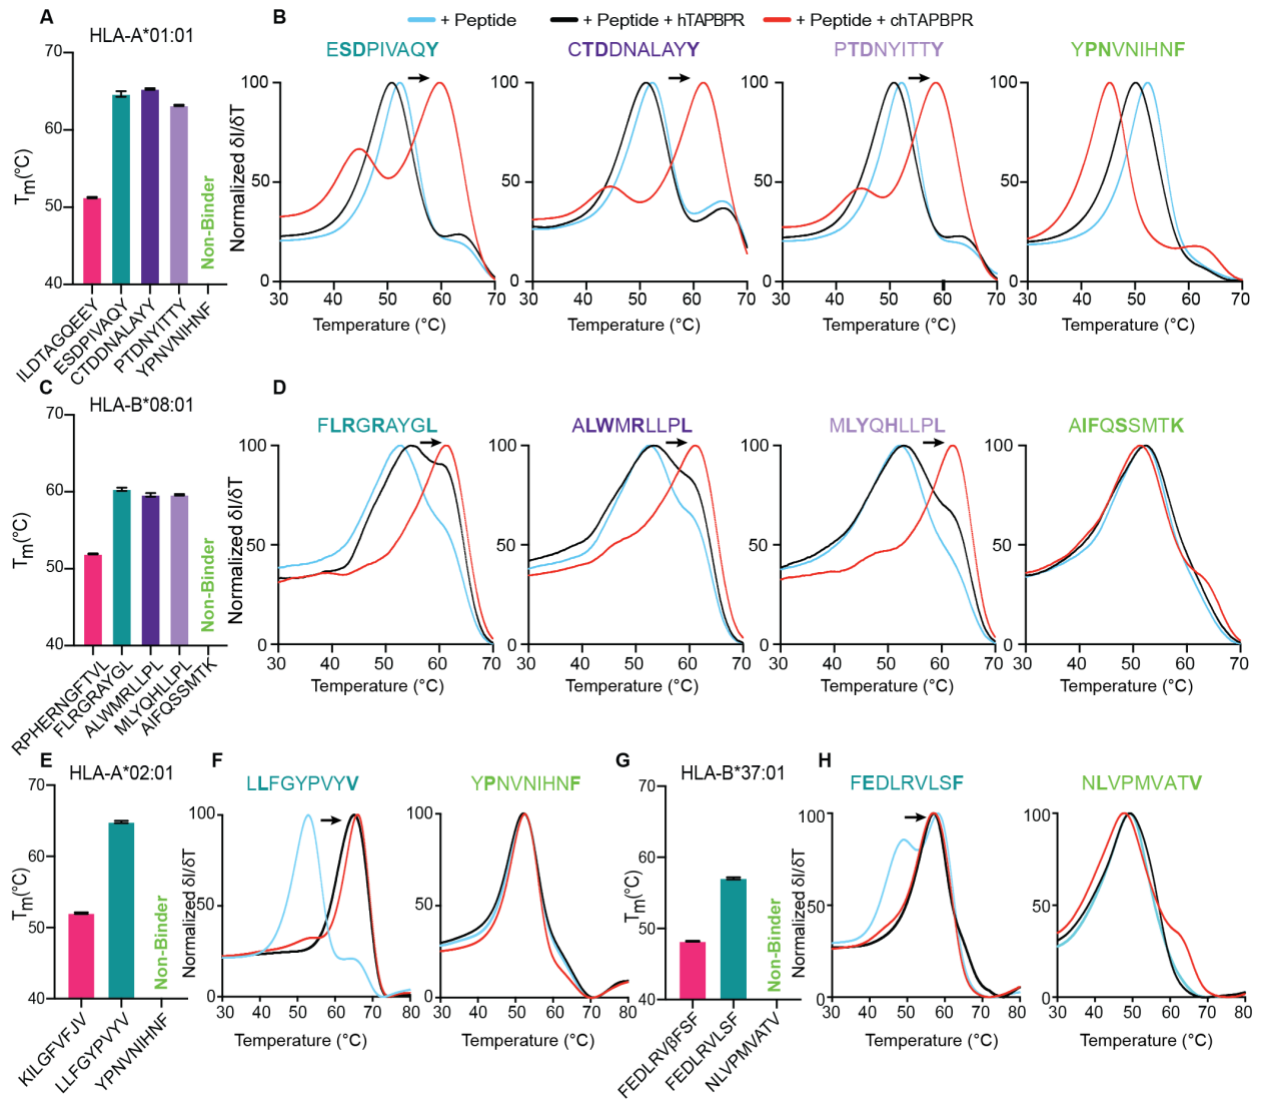

**Figure S10. TAPBPR orthologs catalyze a complete exchange of HLA-A\*01:01, B\*08:01, A\*02:01, and B\*37:01 for high-affinity peptides.** (A), Melting temperature ( $T_m$ , °C) obtained from differential scanning fluorimetry (DSF) of HLA-A\*01:01 bound to ILDTAGQEYY, ESDPIVAQY, CTDDNALAYY, or PTDNYITTY. Data are mean  $\pm$   $\sigma$  for  $n = 3$  technical replicates. (B), Thermal stabilities of HLA-A\*01:01/ILDTAGQEYY were determined in the presence of 10-fold molar excess ESDPIVAQY, CTDDNALAYY, PTDNYITTY, or a non-specific peptide YPNVNIHNF for two-hour incubation at room temperature (RT) (light blue) with a catalytic amount of human (black) or chicken (red) TAPBPR. (C), Melting temperature ( $T_m$ , °C)

obtained from DSF of HLA-B\*08:01 bound to peptide RIPHERNGFTVL, FLRGRAYGL, ALWMRLLPL, or MLYQHLLPL. Data are mean  $\pm \sigma$  for n = 3 technical replicates. **(D)**, Thermal stabilities of HLA-B\*08:01/RIPHERNGFTVL were determined in the presence of 10-fold molar excess FLRGRAYGL, ALWMRLLPL, MLYQHLLPL, or a non-specific peptide AIFQSSMTK for two-hour incubation at RT (light blue) with a catalytic amount of human (black) or chicken (red) TAPBPR. **(E)**, Melting temperature ( $T_m$ , °C) obtained from DSF of HLA-A\*02:01 bound to KILGFVVFJV and LLFGYPVYV. Data are mean  $\pm \sigma$  for n = 3 technical replicates. **(F)**, Thermal stabilities of HLA-A\*02:01/KILGFVVFJV in the presence of 10-fold molar excess LLFGYPVYV and a non-specific peptide YPNVNIHNF for two-hour incubation at RT (light blue) with a catalytic amount of human (black) or chicken (red) TAPBPR. **(G)**, Melting temperature ( $T_m$ , °C) obtained from DSF of HLA-B\*37:01 bound to FEDLRV $\beta$ FSF and FEDLRVLSF. Data are mean  $\pm \sigma$  for n = 3 technical replicates. **(H)**, Thermal stabilities of HLA-B\*37:01/FEDLRV $\beta$ FSF in the presence of 10-fold molar excess FEDLRVLSF and a non-specific peptide NLVPMVATV for two-hour incubation at RT (light blue) with a catalytic amount of human (black) or chicken (red) TAPBPR.

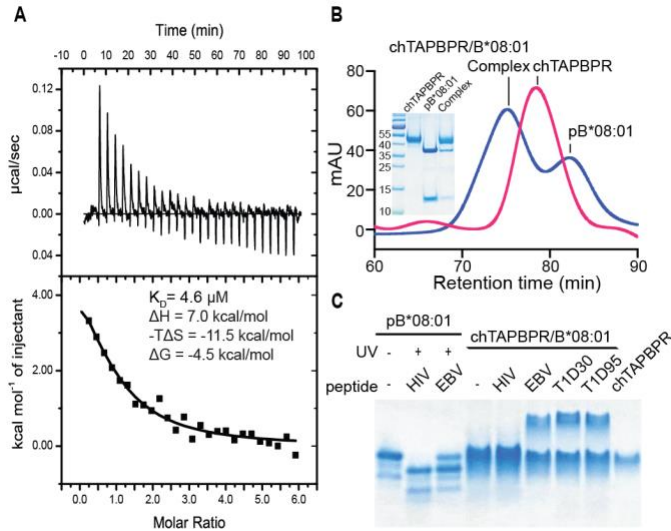

**Figure S11. Chicken TAPBPR interacts with both peptide-loaded and peptide-receptive HLA-B\*08:01 molecules.** (A), Representative ITC titration of HLA-B\*08:01/FLRGRAJGL (150  $\mu\text{M}$ ) with 3-fold excess peptide FLRGRAJGL (450  $\mu\text{M}$ ) into a sample containing 5  $\mu\text{M}$  chTAPBPR with 450  $\mu\text{M}$  FLRGRAJGL. The black line is the fit of the isotherm. Fitted values for  $K_D$ ,  $\Delta H$ ,  $-\Delta S$ , and  $\Delta G$  were determined using a 1-site binding model. (B), SEC analysis of chTAPBPR (in pink) and the mixture of chTAPBPR and HLA-B\*08:01/FLRGRAJGL after 40-minute UV irradiation (in blue). The peaks of chTAPBPR, HLA-B\*08:01/FLRGRAJGL (pB\*08:01), and chTAPBPR/HLA-B\*08:01 complex were collected, concentrated, and ran on SDS/PAGE, which confirmed the identity of the complex peak. (C), The electrophoretic mobility shift assay (EMSA) of HLA-B\*08:01/FLRGRAJGL (lane 1) and UV-irradiated HLA-B\*08:01 with a 10-fold molar excess of a non-specific peptide AIFQSSMTK (HIV, lane 2) or a high-affinity peptide FLRGRAYGL (EBV, lane 3). Peptide-receptive chTAPBPR/HLA-B\*08:01 complexes were loaded alone (lane 4) and with a 10-fold molar excess of the non-specific peptide HIV (lane 5) or the high-affinity peptides, EBV (lane 6), ALWMRLLPL (T1D30, lane 7), and MLYQHLLPL (T1D95, lane 8). ChTAPBPR alone was also loaded as a control (lane 10).

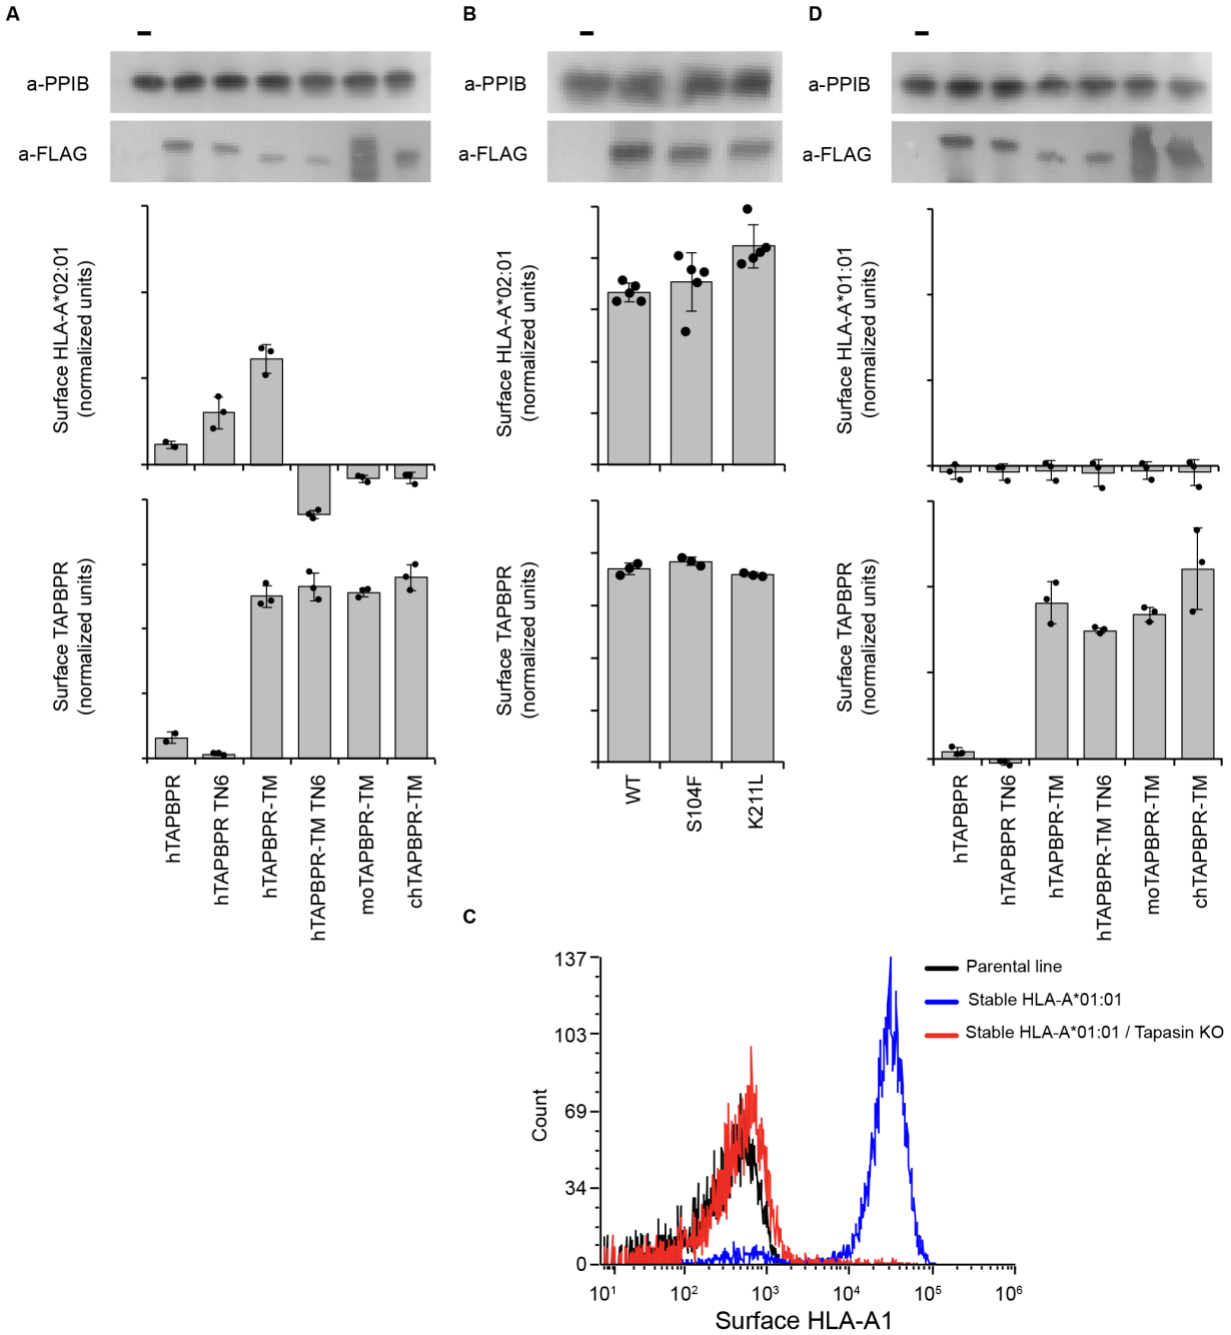

**Figure S12. TAPBPR-TM promotes surface expression of HLA-A\*02:01.** (A), Tapasin-KO Expi293F cells were transiently transfected with FLAG-tagged TAPBPR. (Top) Western blots show total expression levels of TAPBPR proteins. The housekeeping enzyme PPIB was detected as a loading control. (Center) Surface levels of endogenous HLA-A\*02:01 were measured by flow cytometry. Fluorescence levels of vector-only transfected cells were subtracted. hTAPBPR

mediates a small increase in surface HLA-A\*02:01 that is not disrupted by the TN6 mutations, whereas hTAPBPR-TM mediates a large increase in surface HLA-A\*02:01 that is decreased by the TN6 mutations. The data are consistent with intracellular TAPBPR proteins interacting with nascent HLA-A\*02:01 (and sequestering a pool of HLA-A\*02:01 intracellularly) in a manner independent of the TN6 mutations, whereas surface interactions are diminished by the TN6 mutations. (Bottom) Surface levels of FLAG-tagged TAPBPR measured by flow cytometry. TAPBPR with a native C-terminus is primarily intracellular, whereas TAPBPR-TM proteins traffic to the plasma membrane. Data are mean  $\pm \sigma$ , n = 3 independent replicates. **(B)**, Tapasin-KO Expi293F cells were transfected with WT, S104F, and K211L hTAPBPR-TM. (Top) Total expression of hTAPBPR-TM proteins by western blot, (center) surface expression of HLA-A\*02:01 by flow cytometry, and (bottom) surface expression of hTAPBPR-TM proteins by flow cytometry. Data are mean  $\pm \sigma$ , n = 5 independent replicates. **(C)**, To generate an HLA-A\*01:01 positive/tapasin-KO line, Expi293F cells (parental, black) were stably transfected with untagged HLA-A\*01:01 (blue). The tapasin gene was then targeted by Cas9 as previously described to create the final line (red). Cells were stained with anti-HLA-A\*01:01 for flow cytometry analysis. **(D)**, HLA-A\*01:01 positive/tapasin-KO Expi293F cells were transfected with TAPBPR constructs. (Top) Total expression of TAPBPR proteins by western blot, (center) surface expression of HLA-A\*01:01 by flow cytometry, and (bottom) surface expression of TAPBPR proteins by flow cytometry. The TAPBPR proteins have no effect on surface HLA-A\*01:01 levels. Data are mean  $\pm \sigma$ , n = 3 independent replicates.

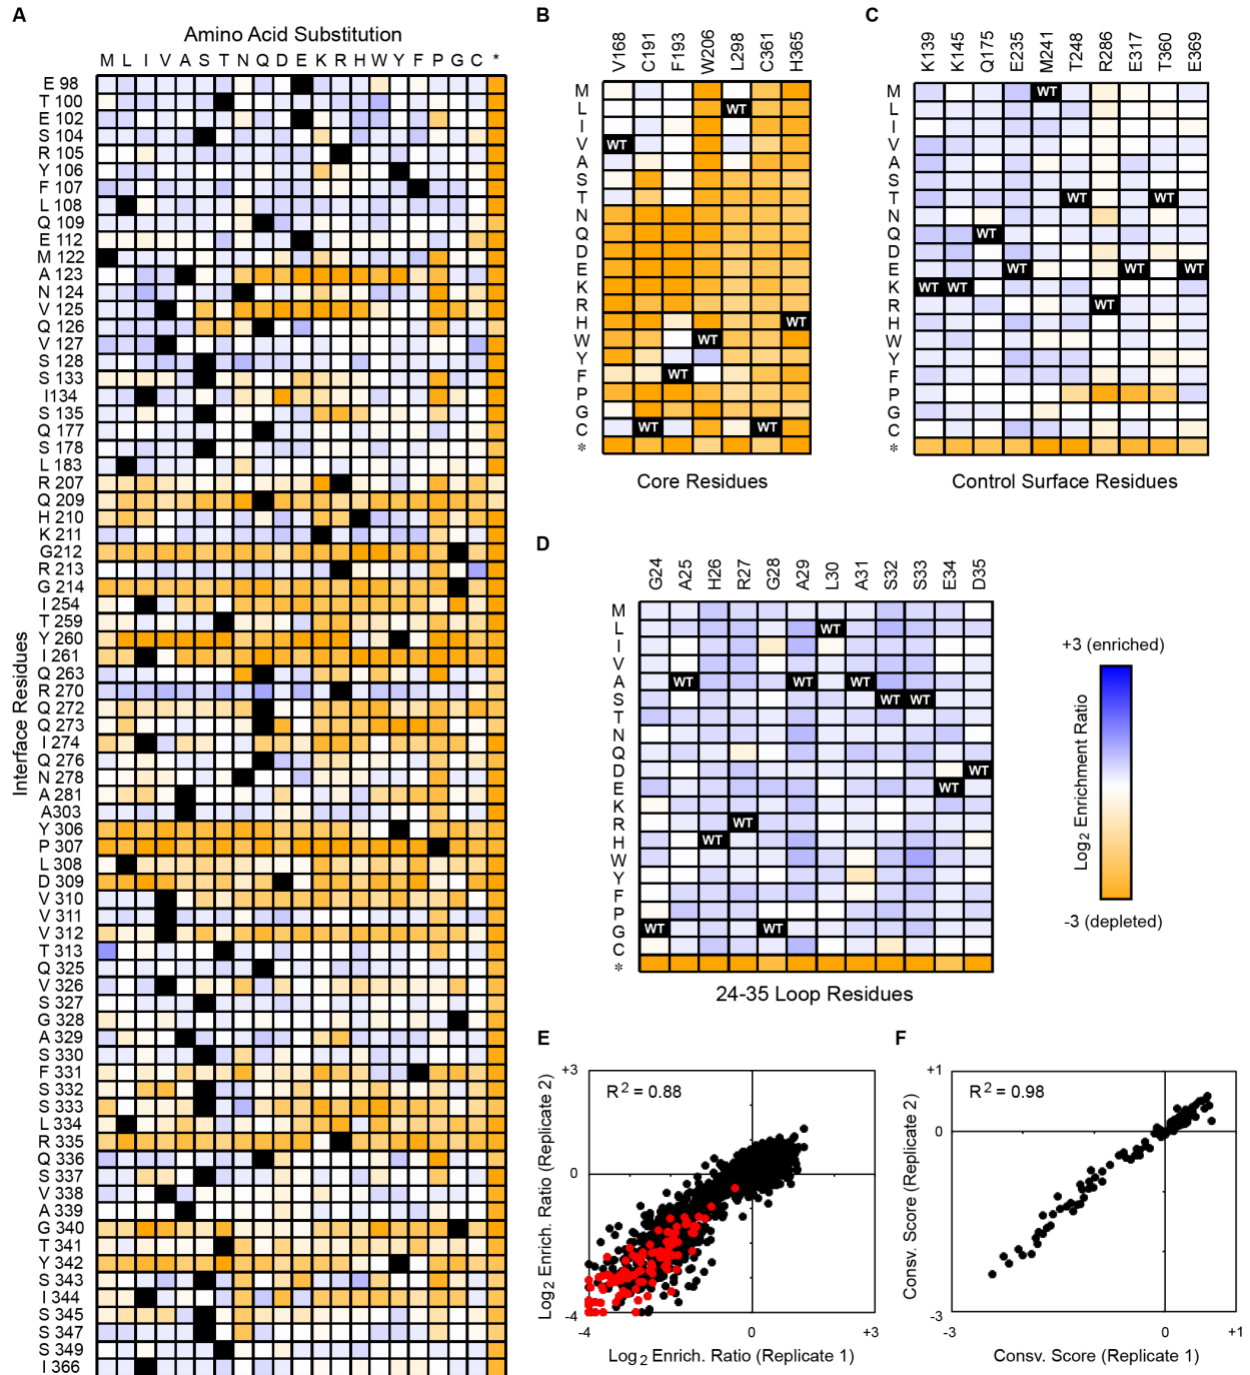

**Figure S13. The mutational landscape of human TAPBPR-TM based on promoting surface expression of HLA-A\*02:01.** (A), Log<sub>2</sub> enrichment ratios from the deep mutational scan are plotted from  $\leq -3$  (orange, deleterious/depleted mutations) to  $\geq +3$  (blue, enriched mutations). Amino acid substitutions are on the horizontal axis, hTAPBPR-TM residue position is on the

vertical axis. \*, stop codon. Wild type amino acids are in black. **(B)-(D)**, Heat maps plot the  $\log_2$  enrichment ratios from  $\leq -3$  (orange) to  $\geq +3$  (blue) for mutations in hTAPBPR-TM in the **(B)** core, **(C)** on the surface away from the MHC-I interface, and **(D)** in the 24-35 loop. Amino acid substitutions are on the vertical axes, hTAPBPR-TM residue positions are on the horizontal axes. **(E)**,  $\log_2$  enrichment ratios for each mutation in hTAPBPR-TM are plotted from two independent sorting experiments.  $R^2$  is indicated for the agreement between replicates for missense mutations in black. Nonsense mutations are red. **(F)**, Conservation scores, calculated by averaging the  $\log_2$  enrichment ratios for all amino acid substitutions at a given hTAPBPR-TM residue, are plotted, showing close agreement between two independent sorting experiments.

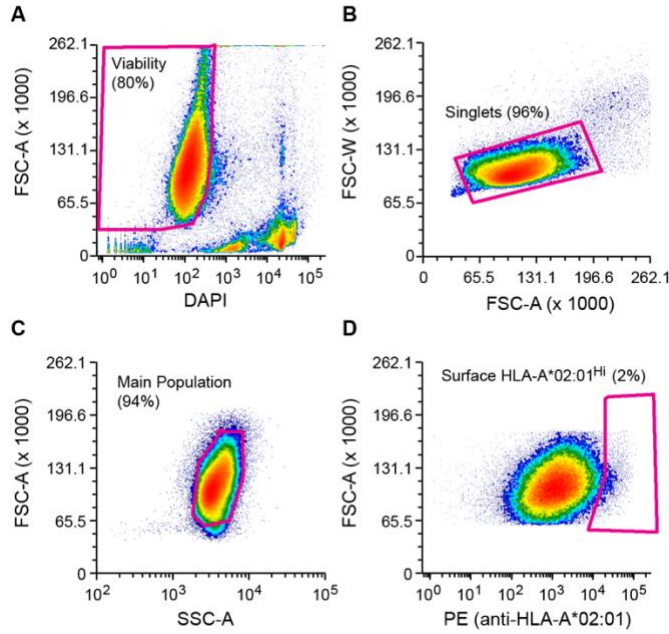

**Figure S14. Sorting strategy for the deep mutational scan of TAPBPR-TM.** Tapasin-KO Expi293F cells were transfected with a plasmid library encoding TAPBPR-TM mutants, under conditions previously shown to result in cells typically expressing no more than a single coding sequence. Flow cytometry histograms show how the transfected cell cultures were gated for FACS to enrich for cells expressing TAPBPR-TM mutants that promote surface HLA-A\*02:01 localization. Cells were gated for viability (**A**, DAPI negative), by forward scattering (FSC-A/area and FSC-W/width) to exclude doublets (**B**), by forward (FSC) and side (SSC) scattering for the main population (**C**), and by fluorescence for high levels of staining with anti-HLA-A\*02:01 PE conjugate (**D**). Gates are shown in magenta and the percentages of events that are gated are in parentheses.



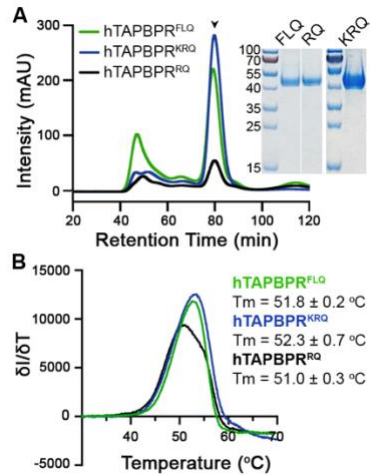

**Figure S15. Purification of recombinant hTAPBPR mutants.** (A), SEC traces of hTAPBPR S104F K211L R270Q (hTAPBPR<sup>FLQ</sup>), R105K K211R R270Q (hTAPBPR<sup>KRQ</sup>), and K211R R270Q (hTAPBPR<sup>RQ</sup>) mutants. The protein peak is indicated by the arrow and is further confirmed by SDS/PAGE analysis. (B), DSF of hTAPBPR ( $T_m = 53.0$  °C, red) relative to hTAPBPR<sup>FLQ</sup> ( $T_m = 51.8$  °C, green), hTAPBPR<sup>KRQ</sup> ( $T_m = 52.3$  °C, blue), and hTAPBPR<sup>RQ</sup> ( $T_m = 51.0$  °C, black).

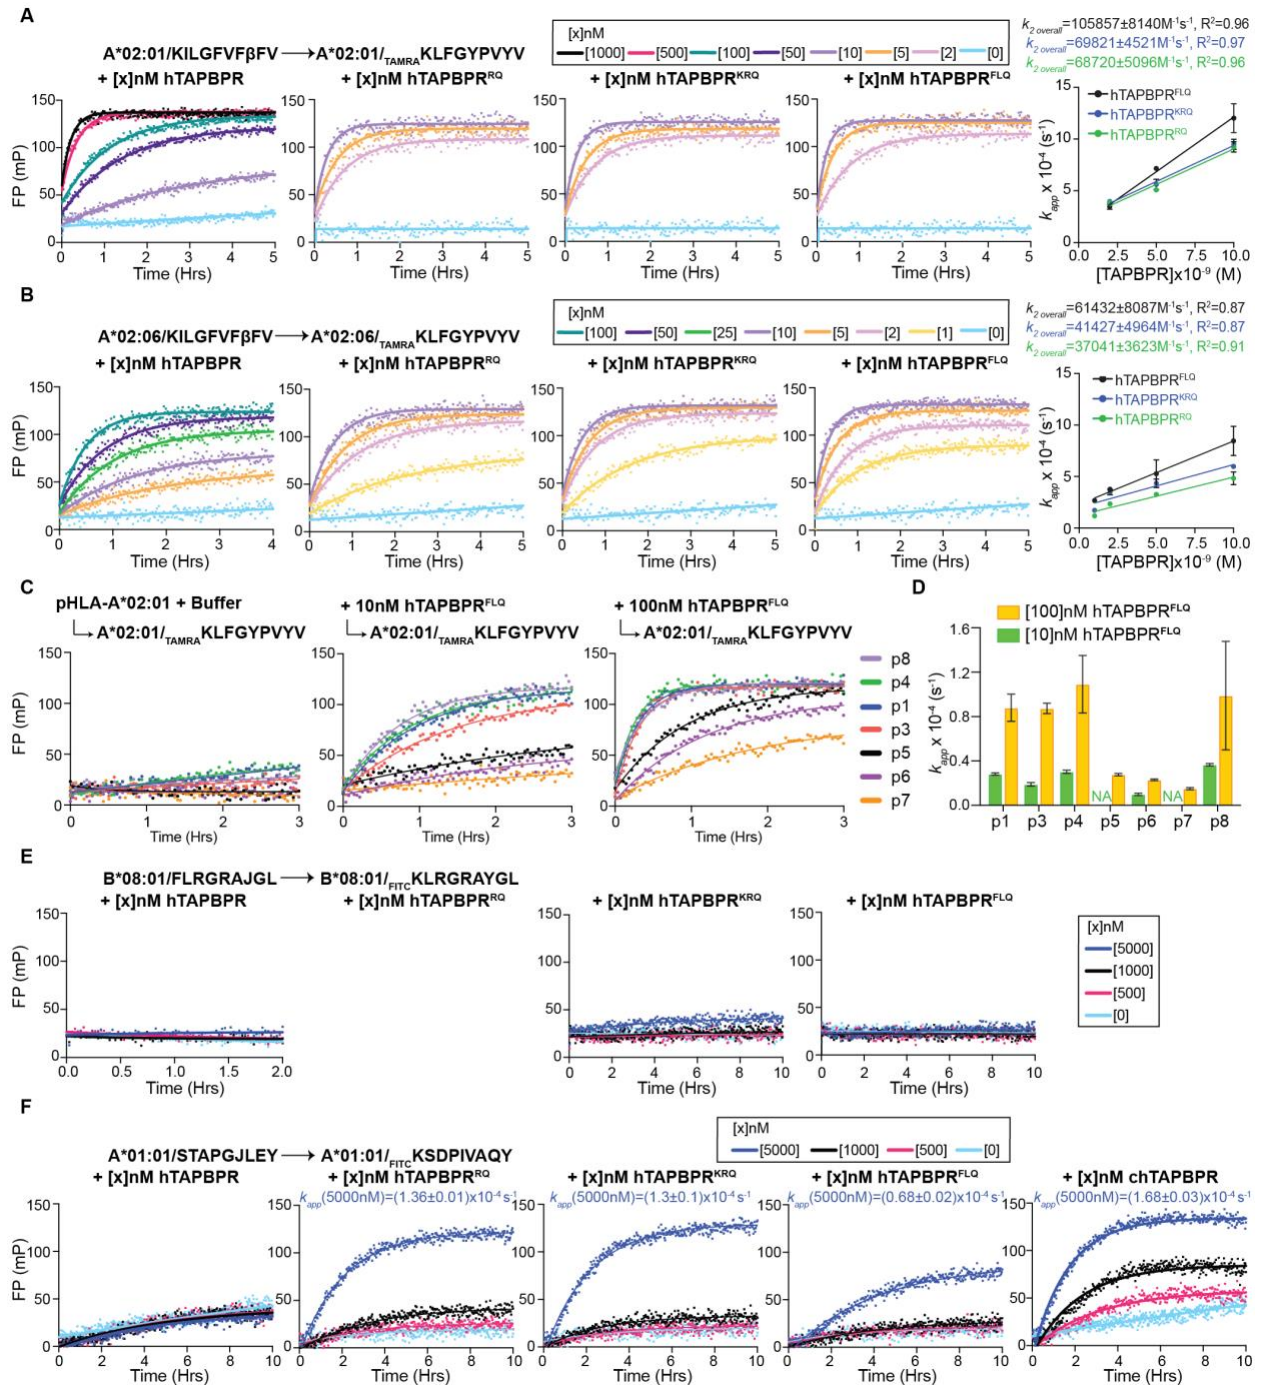

**Figure S16. Human TAPBPR mutants show enhanced peptide exchange kinetics on HLA-A\*02 and enable exchange on HLA-A\*01:01 molecules. (A)-(B),** The association profiles of fluorophore-conjugated peptide TAMRAKLF<sub>GYPVYV</sub> to (A) HLA-A\*02:01/KILGFVFβFV and (B) HLA-A\*02:06/KILGFVFβFV in the presence of hTAPBPR, hTAPBPR<sup>RQ</sup>, hTAPBPR<sup>KRQ</sup>, and

hTAPBPR<sup>FLQ</sup> at various concentrations, as indicated. Results of three replicates (mean) are plotted. The data were fitted to a monoexponential association model to determine apparent rate constants  $k_{app}$ . Linear correlations between the apparent rate constants  $k_{app}$  and the concentrations of TAPBPR orthologs were determined. The extrapolation of the slope determines the overall rate  $k_{2overall}$ . Results of three replicates (mean  $\pm \sigma$ ) are plotted. **(C)**, The association profiles of <sup>TAMRA</sup>KLFGYPVYV to HLA-A\*02:01/ $\beta$ FILGFVFTV (p1), KI $\beta$ FGFVFTV (p3), KIL $\beta$ FFVFTV (p4), KILG $\beta$ FVFTV (p5), KILGF $\beta$ FFTV (p6), KILGFV $\beta$ FTV (p7), KILGFVF $\beta$ FV (p8) without hTAPBPR<sup>FLQ</sup> (buffer), with 10 nM or 100 nM hTAPBPR, as indicated. The data were fitted to a monoexponential association model to determine the apparent rate constant  $k_{app}$ . Results of three replicates are plotted. **(D)**, The comparison of  $k_{app}$  for fluorescent peptide binding to HLA-A\*02:01/KILGFVFTV with  $\beta$ F substitution at indicated positions in the presence of 10nM or 100nM hTAPBPR. The apparent rate constant  $k_{app}$  was determined by fitting the raw trace to a monoexponential association model. Results of three replicates (mean  $\pm \sigma$ ) are plotted. **(E)**, The association profiles of fluorophore-conjugated peptide <sup>FITC</sup>KLRGRAYGL to HLA-B\*08:01/FLRGRAJGL in the presence of hTAPBPR, hTAPBPR<sup>KRQ</sup>, and hTAPBPR<sup>FLQ</sup> at various concentrations, as indicated. Results of three replicates (mean) are plotted. **(F)**, The association profiles of fluorophore-conjugated peptide <sup>FITC</sup>KSDPIVAQY to HLA-A\*01:01/STAPGJLEY in the presence of hTAPBPR, hTAPBPR<sup>RQ</sup>, hTAPBPR<sup>KRQ</sup>, hTAPBPR<sup>FLQ</sup>, and chTAPBPR at various concentrations, as indicated. The data were fitted to a monoexponential association model to determine apparent rate constants  $k_{app}$ . Results of three replicates (mean  $\pm \sigma$ ) are plotted.

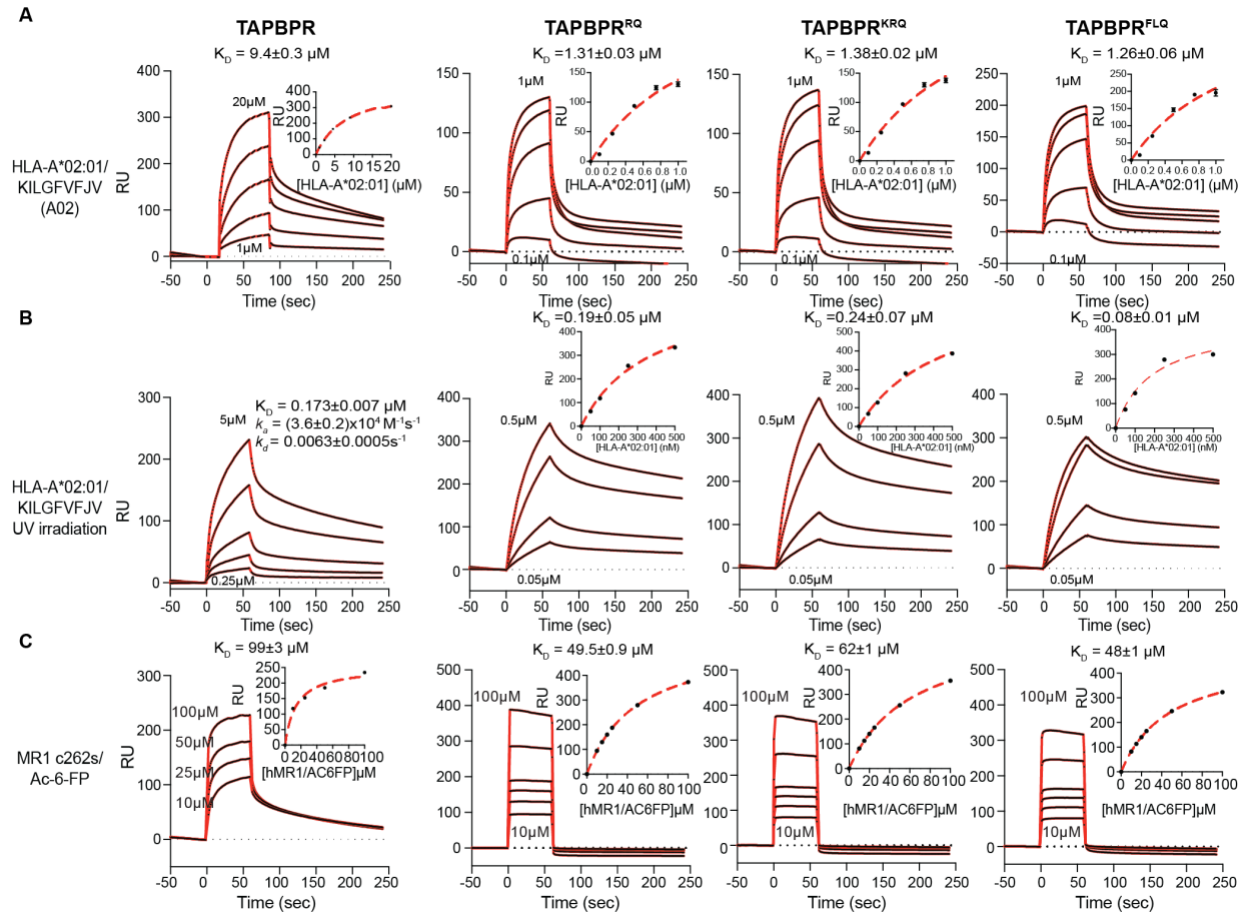

**Figure S17. Assessment of TAPBPR mutations on the interactions with classical and nonclassical MHC-I molecules. (A),** Representative SPR sensorgrams of various concentrations of peptide-loaded HLA-A\*02:01 flowed over a streptavidin chip coupled with hTAPBPR, hTAPBPR<sup>RQ</sup>, hTAPBPR<sup>KRQ</sup>, or hTAPBPR<sup>FLQ</sup>-biotin. **(B),** Representative SPR sensorgrams of various concentrations of peptide-deficient (empty) HLA-A\*02:01 flowed over a streptavidin chip coupled with hTAPBPR, hTAPBPR<sup>RQ</sup>, hTAPBPR<sup>KRQ</sup>, or hTAPBPR<sup>FLQ</sup>-biotin. **(C),** Representative SPR sensorgrams of various concentrations of Ac-6-FP loaded MR1 C262S flowed over a streptavidin chip coupled with hTAPBPR, hTAPBPR<sup>RQ</sup>, hTAPBPR<sup>KRQ</sup>, or hTAPBPR<sup>FLQ</sup>-biotin. The concentrations of analyte for the top and the bottom sensorgrams are noted. Data are

mean  $\pm \sigma$  for  $n = 2$  technical replicates.  $K_D$ , equilibrium constant;  $k_a$ , association rate constant;  $k_d$ , dissociation rate constant; RU, resonance units.

**Table S1.** Mean fluorescence intensity (MFI) ratio of human and chicken TAPBPR relative to the control W6/32 experiments. Alleles with ratios above the threshold (MFI ratio=5.97) are in bold.

| Allotype       | MHC-I MFI ratio |               | Allotype       | MHC-I MFI ratio |                | Allotype       | MHC-I MFI ratio |             |
|----------------|-----------------|---------------|----------------|-----------------|----------------|----------------|-----------------|-------------|
|                | hTAPBPR         | chTAPBPR      |                | hTAPBPR         | chTAPBPR       |                | hTAPBPR         | chTAPBPR    |
| A*01:01        | 3.90            | 2.67          | <b>B*08:01</b> | 3.38            | <b>16.59</b>   | B*51:01        | 3.10            | 3.32        |
| <b>A*02:01</b> | <b>39.68</b>    | 3.88          | B*13:01        | 1.79            | 1.70           | B*51:02        | 3.14            | 3.95        |
| <b>A*02:03</b> | <b>19.10</b>    | 3.28          | B*13:02        | 2.50            | 1.56           | B*52:01        | 2.48            | 2.43        |
| <b>A*02:06</b> | <b>12.75</b>    | 2.97          | B*14:01        | 2.93            | 2.15           | B*53:01        | 1.83            | 2.12        |
| A*03:01        | 4.38            | 5.63          | B*14:02        | 2.43            | 1.58           | B*54:01        | 2.07            | 1.80        |
| A*11:01        | 3.63            | 3.11          | B*15:01        | 3.28            | 1.39           | B*55:01        | 1.74            | 1.47        |
| A*11:02        | 4.63            | 4.09          | B*15:02        | 2.48            | 1.87           | B*56:01        | 2.81            | 1.67        |
| <b>A*23:01</b> | <b>49.93</b>    | <b>9.25</b>   | B*15:03        | 2.31            | 1.46           | B*57:01        | 4.33            | 2.86        |
| <b>A*24:02</b> | <b>20.32</b>    | <b>20.80</b>  | B*15:10        | 2.59            | 4.20           | <b>B*57:03</b> | 2.74            | <b>6.79</b> |
| <b>A*24:03</b> | <b>15.50</b>    | <b>22.43</b>  | B*15:11        | 1.55            | 1.39           | B*58:01        | 2.09            | 1.95        |
| A*25:01        | 5.20            | 4.77          | B*15:13        | 2.34            | 3.54           | <b>B*59:01</b> | 2.71            | <b>6.49</b> |
| A*26:01        | 1.79            | 2.32          | B*15:16        | 2.71            | 3.18           | B*67:01        | 3.06            | 1.87        |
| <b>A*29:01</b> | 3.88            | <b>11.42</b>  | B*18:01        | 1.95            | 1.24           | B*73:01        | 4.86            | 5.09        |
| <b>A*29:02</b> | <b>74.26</b>    | <b>528.17</b> | B*27:05        | 3.23            | 1.77           | B*78:01        | 2.28            | 1.64        |
| A*30:01        | 3.75            | 3.08          | B*27:08        | 2.29            | 1.21           | B*81:01        | 1.73            | 1.82        |
| A*30:02        | 2.88            | 1.80          | B*35:01        | 1.97            | 1.55           | B*82:01        | 1.63            | 1.38        |
| A*31:01        | 3.69            | 2.73          | <b>B*37:01</b> | <b>50.02</b>    | <b>1126.35</b> | <b>C*01:02</b> | 2.49            | <b>6.40</b> |
| <b>A*32:01</b> | <b>8.71</b>     | <b>15.37</b>  | B*38:01        | 3.13            | 5.91           | C*02:02        | 1.84            | 1.49        |
| A*33:01        | 2.63            | 1.56          | B*39:01        | 3.35            | 1.88           | C*03:02        | 2.64            | 1.95        |
| A*33:03        | 2.00            | 2.05          | B*40:01        | 1.62            | 1.27           | C*03:03        | 2.56            | 5.46        |
| A*34:01        | 3.87            | 3.52          | B*40:02        | 2.44            | 1.39           | <b>C*03:04</b> | 2.65            | <b>8.72</b> |
| A*34:02        | 4.00            | 3.50          | B*40:06        | 1.82            | 1.31           | C*04:01        | 1.65            | 1.76        |
| A*36:01        | 3.50            | 2.50          | B*41:01        | 2.39            | 2.14           | C*05:01        | 1.85            | 1.34        |
| A*43:01        | 2.39            | 2.23          | B*42:01        | 2.79            | 2.09           | C*06:02        | 1.36            | 1.59        |
| A*66:01        | 1.66            | 2.30          | B*44:02        | 2.38            | 2.63           | C*07:02        | 1.58            | 1.32        |
| A*66:02        | 2.32            | 3.19          | B*44:03        | 2.14            | 2.16           | C*08:01        | 1.62            | 1.12        |
| <b>A*68:01</b> | <b>6.13</b>     | 3.04          | B*45:01        | 2.86            | 2.23           | C*12:03        | 1.57            | 2.00        |
| <b>A*68:02</b> | <b>115.17</b>   | 4.45          | B*46:01        | 2.21            | 1.80           | C*14:02        | 1.71            | 1.36        |
| <b>A*69:01</b> | <b>10.17</b>    | 2.33          | B*47:01        | 3.00            | 2.60           | C*15:02        | 2.00            | 1.52        |
| <b>A*74:01</b> | <b>6.08</b>     | <b>7.53</b>   | B*48:01        | 1.88            | 2.16           | C*16:01        | 1.60            | 1.29        |
| A*80:01        | 2.88            | 2.10          | B*49:01        | 3.24            | 2.04           | C*17:01        | 1.83            | 1.59        |
| B*07:02        | 2.58            | 2.41          | B*50:01        | 2.43            | 1.62           | C*18:02        | 1.58            | 1.64        |

**Table S2.** Summary of peptides used in this study.

| <b>Peptide Name</b> | <b>HLA Allotype</b>         | <b>Sequence</b>      |
|---------------------|-----------------------------|----------------------|
| PhotoA01            | A*01:01                     | STAPGJLEY            |
| PhotoA02            | A*02:01                     | KILGFVVFJV           |
| PhotoA24            | A*24:02                     | VYGJVRACL            |
| PhotoA30            | A*30:01                     | AIFQSSMJK            |
| PhotoA29            | A*29:02                     | VFAQVKQJY            |
| PhotoA68            | A*68:02                     | SVYDFVJL             |
| PhotoA11            | A*11:01                     | KLIETYFJK            |
| PhotoB08            | B*08:01                     | FLRGRAJGL            |
| PhotoB37            | B*37:01                     | FEDLRVJSF            |
| PhotoE01            | E*01:03                     | VMAPJTLVL            |
| PhotoG01            | G*01:01                     | VMAPJTLVL            |
| BetaA02             | A*02:01                     | KILGFVF( $\beta$ )V  |
| BetaA03_A11         | A*03:01 & A*11:01           | KLIETYF( $\beta$ )K  |
| BetaA30             | A*30:01                     | KTFPPTTE( $\beta$ )K |
| BetaA68             | A*68:02                     | ETAGIGIL( $\beta$ )V |
| BetaB37             | B*37:01                     | FEDLRV( $\beta$ )SF  |
| FITCA01             | A*01:01                     | FITC-KSDPIVAQY       |
| FITCA30             | A*30:01                     | FITC-KTFPPTPEPK      |
| TAMRAA02            | A*02:01 & A*68:02           | TAMRA-KLFGYPVYV      |
| TAMRAA24            | A*24:02                     | TAMRA-KYNPIRTTF      |
| FITCA03_A11         | A*03:01 & A*11:01           | FITC-KLIETYFSK       |
| FITCA29             | A*29:02                     | FITC-KLIDVFHQY       |
| FITCB08             | B*08:01                     | FITC-KLRGRAYGL       |
| FITCB37             | B*37:01                     | FITC-KEDLRVSSF       |
| Phox2b              | A*24:02                     | QYNPIRTTF            |
| TAX9                | A*02:01                     | LLFGYPVYV            |
| p29                 | A*02:01 & A*01:01 nonbinder | YPNVNIHNF            |
| RAS                 | A*01:01                     | ILDTAGQEEY           |
| Titin               | A*01:01                     | ESDPIVAQY            |
| SARS P37            | A*01:01                     | CTDDNALAYY           |
| SARS P39            | A*01:01                     | PTDNYITTY            |
| SARS P44            | A*29:02                     | FTSDYYQLY            |
| HCMV                | B*08:01                     | RIPHERNGFTVL         |
| EBV                 | B*08:01                     | FLRGRAYGL            |
| T1D30               | B*08:01                     | ALWMRLLPL            |
| T1D95               | B*08:01                     | MLYQHLLPL            |
| HIV                 | B*08:01 nonbinder           | AIFQSSMTK            |
| NP338               | B*37:01                     | FEDLRVLSF            |
| CMV pp65            | B*37:01 nonbinder           | NLVPMVATV            |

**Table S3.** Summary of HLA-A\*02:01 loaded with KILGFVFTV-derived peptides comprising substitutions of different residues with  $\beta$ F and micropolymorphic HLA-A\*02 subtypes loaded with KILGFVF $\beta$ FV.

| <b>HLA-A*02 subtypes</b>   | <b>T<sub>m</sub> (°C)</b> |
|----------------------------|---------------------------|
| A*02:01/ $\beta$ FILGFVFTV | 53.9                      |
| A*02:01/KI $\beta$ FGFVFTV | 58.1                      |
| A*02:01/KIL $\beta$ FFVFTV | 54.3                      |
| A*02:01/KILG $\beta$ FVFTV | 61.8                      |
| A*02:01/KILGF $\beta$ FTV  | 60.7                      |
| A*02:01/KILGFV $\beta$ FTV | 63.3                      |
| A*02:01/KILGFVF $\beta$ FV | 53.2                      |
| A*02:01/BetaA02            | 52.6                      |
| A*02:06/BetaA02            | 53.1                      |
| A*02:11/BetaA02            | 53.8                      |
| A*02:71/BetaA02            | 54.2                      |
| A*02:77/BetaA02            | 54.2                      |



**Table S4.** Summary of MHC-I residues contacting TAPBPR for selected HLA alleles used in this study, including HLA-A\*01:01, A\*30:01, A\*29:02, A\*02:01, A\*68:02, A\*03:01, A\*11:01, A\*24:02, B\*08:01, B\*37:01, E\*01:03, and G\*01:01.

| <b>HLA Allele</b> | <b>Amino Acid Position</b> [84, 86, 113, 115, 120, 122, 127, 128, 134, 135, 136, 138, 141, 142, 144, 145, 148, 225, 228, 229, 230, 231, 232, 244] |
|-------------------|---------------------------------------------------------------------------------------------------------------------------------------------------|
| A*01:01           | YNYQGDNETAAMQIKRETTELVEW                                                                                                                          |
| A*30:01           | YNYQGDNETAAMQIQRETTELVEW                                                                                                                          |
| A*29:02           | YNYQGDNETAAMQIQRETTELVEW                                                                                                                          |
| A*02:01           | YNYQGDKETAAMQTKHETTELVEW                                                                                                                          |
| A*68:02           | YNYQGDKETAAMQTKHETTELVEW                                                                                                                          |
| A*03:01           | YNYQGDNETAAMQIKRETTELVEW                                                                                                                          |
| A*11:01           | YNYQGDNETAAMQIKRETTELVEW                                                                                                                          |
| A*24:02           | YNYQGDKETAAMQIKRETTELVEW                                                                                                                          |
| B*08:01           | YNHQGDNETAATQIQRETTELVEW                                                                                                                          |
| B*37:01           | YNYQGDNETAATQIQRETTELVEW                                                                                                                          |
| E*01:03           | YNYQGDNETAVTQIEQNTTELVEW                                                                                                                          |
| G*01:01           | YNYQGDNETAATQIKRETVELVEW                                                                                                                          |
